# Supplementary material for: RSL genes are sufficient for rhizoid system development in early diverging land plants
Source: Oxford University Press journal article supplement (doi:10.1242/dev.060582), 2011-05-10
Supplement: dev060582tables1.pdf [file dev060582tables1.pdf]

**Table S1. Primers used in this study**

| Name                      | Sequence                              |
|---------------------------|---------------------------------------|
| PpRSL1 GUS Fragment 1 For | CAAGGCGCGCCGCATGCGATTTTCTATCTGGTTTCA  |
| PpRSL1 GUS Fragment 1 Rev | CCGATCGATTTACACAAATTTGAAGCACGCTCTT    |
| PpRSL1 GUS Fragment 2 For | CCGGGATCCAAATGGCAGGTCCAGCAGGAGCTT     |
| PpRSL1 GUS Fragment 2 Rev | CCCAAGCTTGCGCTTCGGCAGATGCATCAA        |
| PpRSL2 GUS Fragment 1 For | CCAGGCGCGCCGCTCTCCTTCTAAACCAATCATGGA  |
| PpRSL2 GUS Fragment 1 Rev | CCGAACGTTTCGATCCACCTTGGTCTTTCTTGTCTGT |
| PpRSL2 GUS Fragment 2 For | CCGCCCGGGCGATGAATAAGAAGCCTATGCAAA     |
| PpRSL2 GUS Fragment 2 Rev | CCCGGATCCCGACAGAAGTTGCACATAAGTAA      |
| 35S PpRSL2 For            | CCAGGATCCATGAATAAGAAGCCTATGCAA        |
| 35S PpRSL2 Rev            | CCAGTCGACCTACTCTTTGTCTGGCAGAAAGGT     |
| PpRSL1 promoter UP        | CTGGCATGCGCTGTTATATG                  |
| PpRSL2 promoter UP        | GATTCGAACAGCAGATGCAG                  |
| GUS-Start Rev             | TTTCTACAGGACGGACCATA                  |
| PpRSL1 RT For             | CAATGATCCGCAGAGCATT                   |
| PpRSL1 RT Rev             | GTCAGCAGAAGGCTGATTG                   |
| PpRSL2 RT For             | GGGACCTCAAGGATGCAGCA                  |
| PpRSL2 RT Rev             | CGAACTCAATAACGTCAGGA                  |
| GAPDH For                 | GAGATAGGAGCATCTGTACCGCTTGT            |
| GAPDH Rev                 | GGAGTTGAATGGAAAGCTCAC                 |
